# Supplementary material
Source: publisher site journal article supplement (https://www.dovepress.com/article/507047)
Supplement: Supplementary file 1 [file get_supplementary_file.php]

Supplementary Material

Supplementary Material Item 1 – The Three Phases of the Curriculum

| Phase | Intended Learning Outcomes | Content |
| --- | --- | --- |
| 1 | Create an effective and feasible plan to prepare for the different components of the medical school application process. | Three sessions focused on the application process to medical school, and life as a medical student and doctor. |
| 2 | Apply teamwork skills to a problem-based learning (PBL) session; Employ professional communication skills when interviewing simulated patients. Conduct research on a medical topic to create a brief presentation. | One session on ideal teamwork skills for medical students and doctors, followed by a PBL session One session on core communication skills for interviewing simulated patients An optional summary research project where pupils receive support from volunteers to conduct research and present information. |
| 3 | Write an effective paragraph on a personal statement; Answer common medical school interview questions with sound structure, reasoning, and communication skills. | Two sessions on personal statement writing; Two sessions on medical school interviews. |

Supplementary Material Item 2 – Session Plan Structure

| 1. Introduction: learning outcomes were discussed with the pupils, and there was exploration of their prior knowledge of the sessional topic. 2. Learning content: The facilitator provided the pupils with information building towards learning outcomes, usually through a brief presentation. Other activities and techniques were used to provide learning guidance. For example, in a session on personal statements pupils analysed different examples of text to critique them based on their new learning. 3. Application, feedback, and assessment: Pupils then took part in an activity to apply what they had learnt. Feedback was provided to students about their performance, for example interviewing a simulated patient. Formative assessment was used to ensure pupils had met the intended learning outcomes. 4. Conclusion: Key messages were summarised, and pupils were sign-posted to resources on the topic. |
| --- |

Supplementary Material Item 3 – Interview Guide

Hello and thank you to you all for agreeing to participate in this focus group. I would like to speak with you about your experiences as part the Lancashire Access Medics programme and any impact this has had on you.

Before we start, please take a note of the following ground rules for conducting the discussion. This includes having one speaker at a time, respect for other speakers, and not to repeat details of the discussion outside the group. Please remember that the focus group is voluntary and you can withdraw from it at any time. Also, please note that we will record your voice during the focus group. What were your experiences on the Lancashire Access Medics project?

- Finding out about the project
- Signing up to the project
- Receiving invitations to project sessions
- Presentations in sessions
- Group discussions in sessions
- Communicating with volunteers over e-mail
- Optional Research Project

What impact has LAM had on you?

- Confidence in applying to medical school
- Confidence in becoming a doctor
- Choices of medical schools
- Aptitude tests
- Personal statements
- Interviews for medical school
- A levels
- Communication Skills
- Leadership Skills
- Teamwork Skills

What else do you think would have been helpful for you to have been included in the Lancashire Access Medics project?

Is there anything else you would like to add?

Thank you all very much for your time and your comments, they are very valuable in improving the Lancashire Access Medics programme.
